# Supplementary material for: Bridging the structural gap of supported vanadium oxides for oxidative dehydrogenation of propane with carbon dioxide
Source: Royal Society of Chemistry journal article supplement (doi:10.1039/d4ey00094c), 2024-01-01
Supplement: d4ey00094c12.pdf [file d4ey00094c12.pdf]

## Electronic supplementary information

### **Bridging the structural gap of supported vanadium oxides for oxidative dehydrogenation of propane with carbon dioxide**

Li Wang<sup>a, b</sup>, Heng-Bo Zhang<sup>a</sup>, Rong-Rong Hu<sup>a</sup>, Han-Qing Ge<sup>a</sup>, Yong-Hong Song<sup>a</sup>, Guo-Qing  
Yang<sup>a, \*</sup>, Yuefeng Li<sup>b</sup>, Zhao-Tie Liu<sup>a</sup>, Zhong-Wen Liu<sup>a, \*</sup>

<sup>a</sup> Key Laboratory of Syngas Conversion of Shaanxi Province, School of Chemistry & Chemical  
Engineering, Shaanxi Normal University, Xi'an 710119, China

<sup>b</sup> Kaili Catalyst & New Materials Co., Ltd., Xi'an 710201, China

\*: Corresponding author (G.-Q. Yang; Z.-W. Liu)

No. 620, West Chang'an Avenue

School of Chemistry & Chemical Engineering

Shaanxi Normal University

Xi'an 710119, China

E-mail: gqyang@snnu.edu.cn (G.-Q. Yang); zwliu@snnu.edu.cn (Z.-W. Liu)

## Table of Contents

|                                                                                                       |    |
|-------------------------------------------------------------------------------------------------------|----|
| 1. Carbon balances of CO <sub>2</sub> -ODP .....                                                      | 3  |
| 2. N <sub>2</sub> adsorption/desorption isotherms of different catalysts .....                        | 4  |
| 3. Calculations of the adsorption edge energy from UV-vis DRS.....                                    | 5  |
| 4. V 2p XP spectra of fresh catalyst.....                                                             | 6  |
| 5. Time-on-stream catalytic results.....                                                              | 7  |
| 6. Relative deactivation rate of the catalysts.....                                                   | 8  |
| 7. Relationship between TOF(CO <sub>2</sub> ) and E <sub>g</sub> over the catalysts .....             | 9  |
| 8. CO <sub>2</sub> pulse experiment for the SiO <sub>2</sub> support .....                            | 10 |
| 9. TG results of spent catalysts .....                                                                | 11 |
| 10. Raman results of spent catalysts .....                                                            | 12 |
| 11. Correlation of the relative deactivation rate with the V oxidation state of the spent catalysts.. | 13 |
| 12. Estimation of the internal and external diffusion limitations.....                                | 14 |

## 1. Carbon balances of CO<sub>2</sub>-ODP

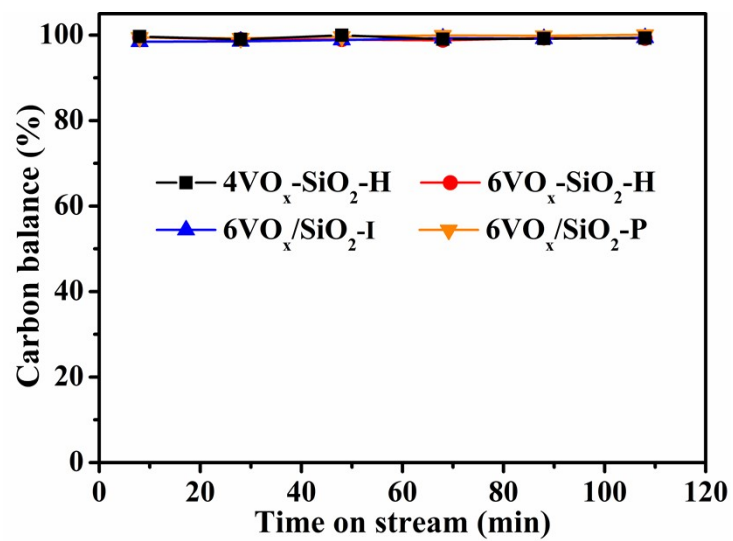

**Fig. S1** Carbon balances of CO<sub>2</sub>-ODP over the catalysts with increasing TOS (The reaction conditions are the same as those given in Fig. 2).

## 2. N<sub>2</sub> adsorption/desorption isotherms of different catalysts

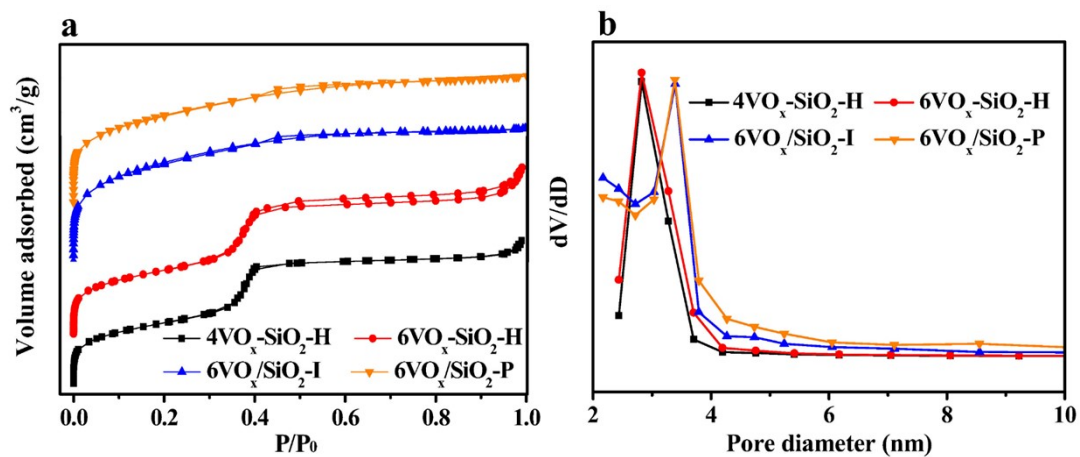

**Fig. S2** N<sub>2</sub> adsorption/desorption isotherms (a) and pore size distributions determined by the BJH method (b) for the catalysts.

### 3. Calculations of the adsorption edge energy from UV-vis DRS

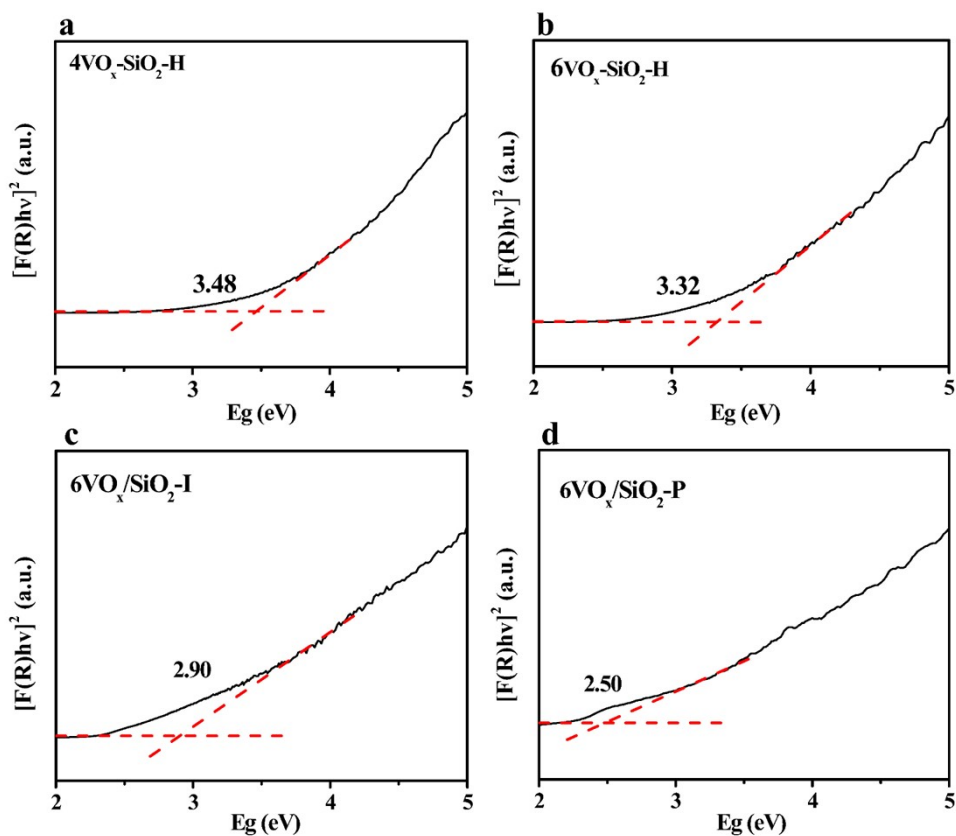

**Fig. S3** Absorption edge energy determined via UV-vis DRS of the catalysts.

#### 4. V 2p XP spectra of fresh catalyst

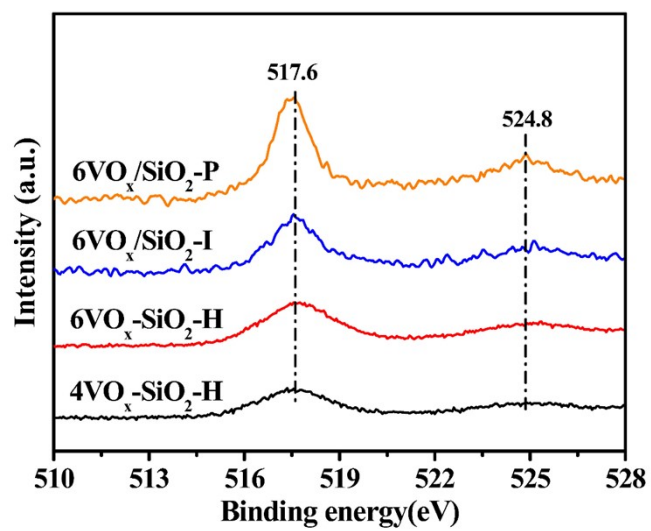

Fig. S4 V 2p XP spectra of the fresh catalysts.

## 5. Time-on-stream catalytic results

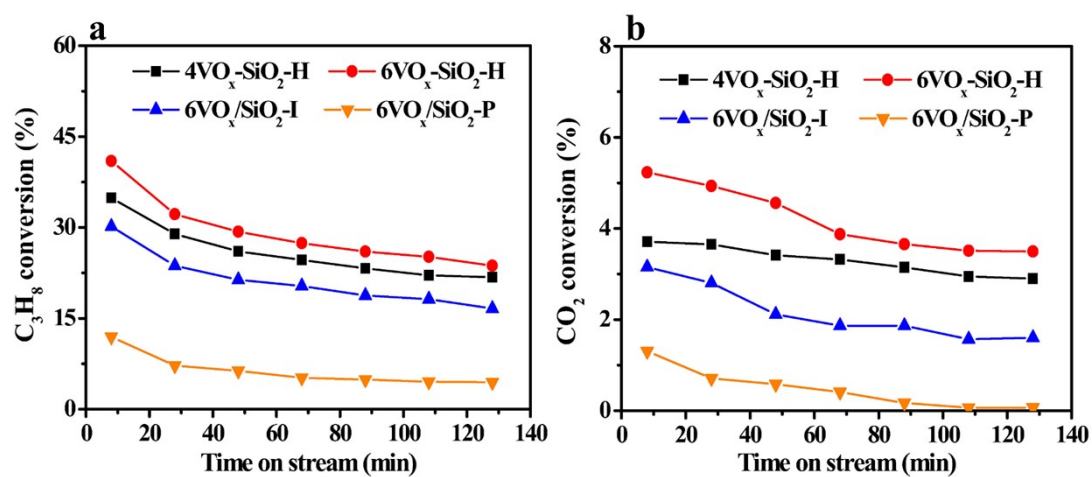

**Fig. S5** Time-on-stream conversions of C<sub>3</sub>H<sub>8</sub> (a) and CO<sub>2</sub> (b) catalyzed by 4VO<sub>x</sub>-SiO<sub>2</sub>-H, 6VO<sub>x</sub>-SiO<sub>2</sub>-H, 6VO<sub>x</sub>/SiO<sub>2</sub>-I and 6VO<sub>x</sub>/SiO<sub>2</sub>-P (The reaction conditions are the same as those given in Fig. 2).

## 6. Relative deactivation rate of the catalysts

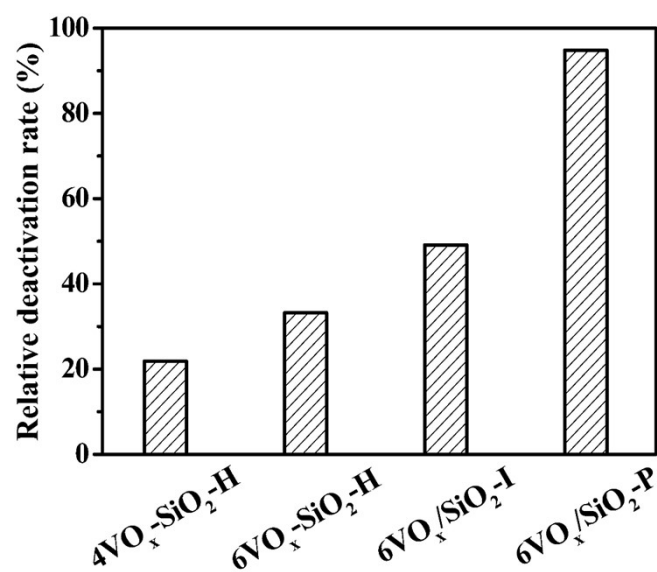

**Fig. S6** Relative deactivation rate of the catalysts calculated based on CO<sub>2</sub> conversion ( $R_{CO_2}$ ) for CO<sub>2</sub>-ODP (The reaction conditions are the same as those given in Fig. 2).



## 7. Relationship between TOF(CO<sub>2</sub>) and E<sub>g</sub> over the catalysts

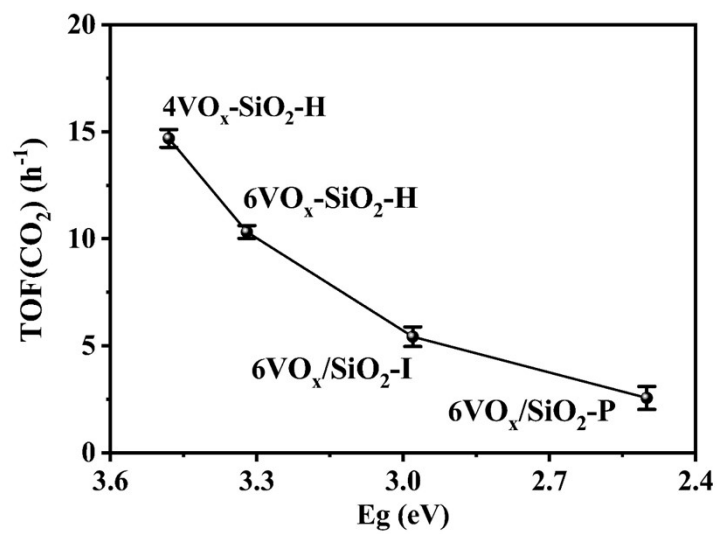

**Fig. S7** Relationship between TOF(CO<sub>2</sub>) and E<sub>g</sub> derived from UV-vis DRS of the catalysts.

## 8. CO<sub>2</sub> pulse experiment for the SiO<sub>2</sub> support

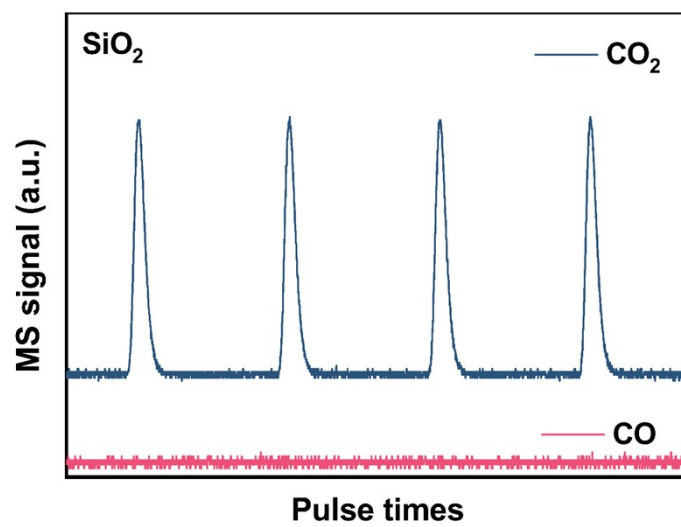

**Fig. S8** Transient MS response of the consecutive CO<sub>2</sub> pulses over the inert SiO<sub>2</sub> at 600 °C.

## 9. TG results of spent catalysts

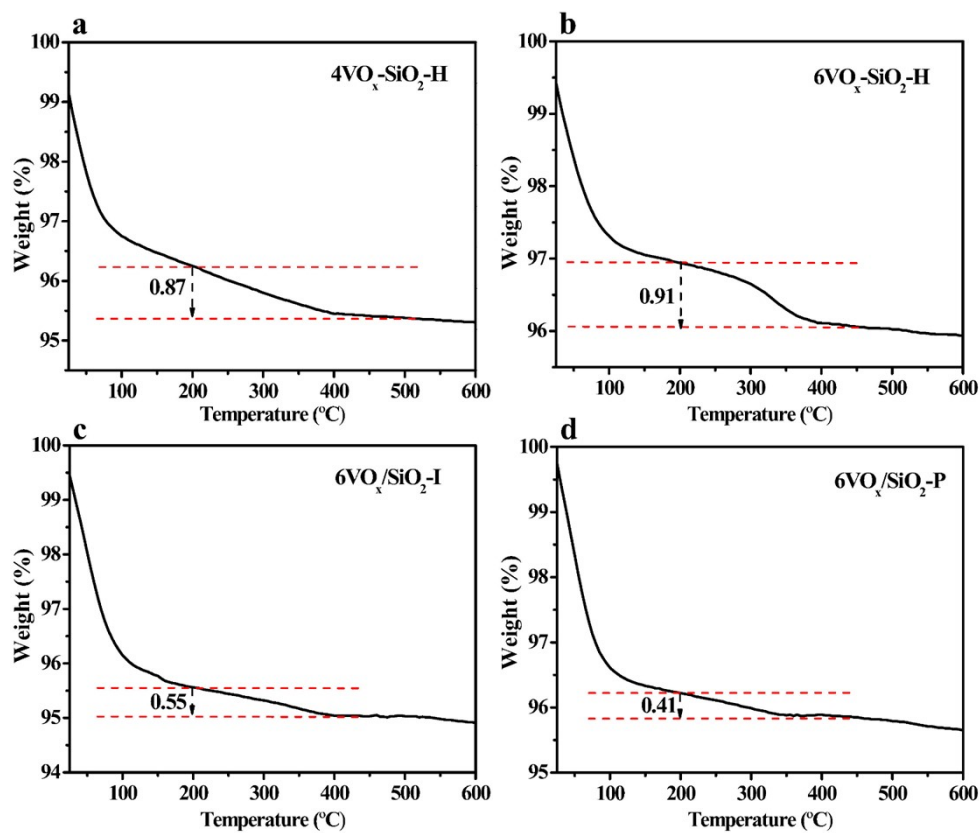

**Fig. S9** TG patterns of the spent catalysts for CO<sub>2</sub>-ODP after a TOS of 128 min (The reaction conditions are the same as those given in Fig. 2, and the weight loss at 200-450 °C is assigned to the burning of deposited coke species).

## 10. Raman results of spent catalysts

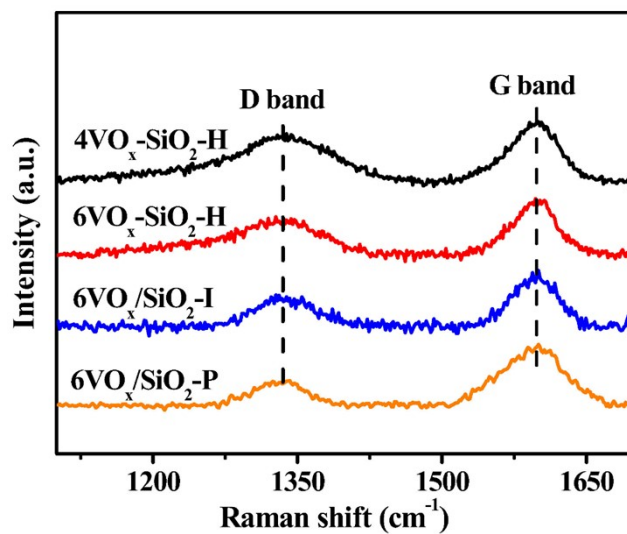

**Fig. S10** Visible Raman spectra of the spent catalyst for CO<sub>2</sub>-ODP after a TOS of 128 min (The reaction conditions are the same as those given in Fig. 2).

## 11. Correlation of the relative deactivation rate with the V oxidation state of the spent catalysts

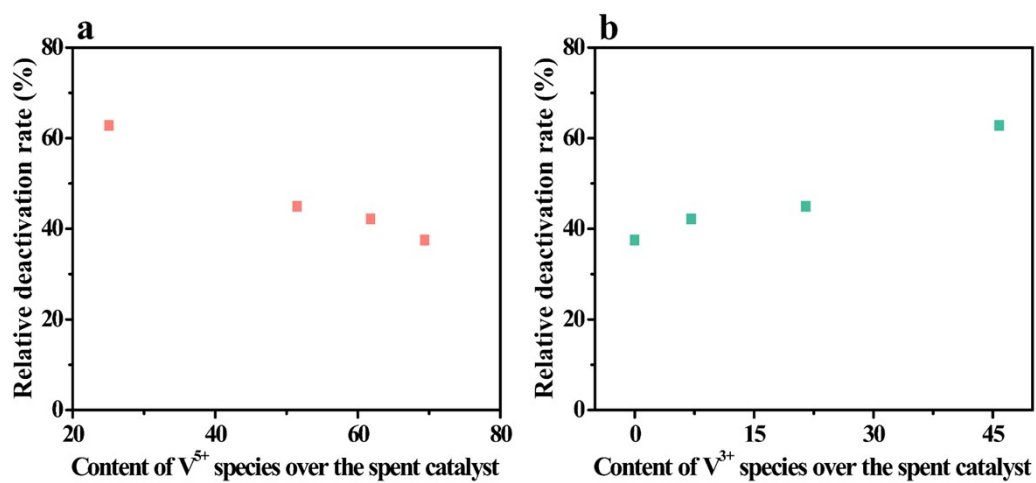

**Fig. S11** Correlation of the relative deactivation rate with the content of V<sup>5+</sup> and V<sup>3+</sup> species over the spent catalysts, respectively.

## 12. Estimation of the internal and external diffusion limitations

The internal and external diffusion limitations for CO<sub>2</sub>-ODP are evaluated for the highest initial propane conversion of 41.0% at a TOS of 8 min over the 6VO<sub>x</sub>-SiO<sub>2</sub>-H catalyst (Fig. 2a) under the reaction conditions of 600°C, 0.1 MPa, Ar/C<sub>3</sub>H<sub>8</sub>/CO<sub>2</sub> molar ratio = 3/2/27, total flow rate = 32 mL/min, and GHSV = 7680 mL·g<sup>-1</sup>·h<sup>-1</sup>., and the catalyst particle size = 0.25-0.42 mm (40-60 mesh).

The potential mass transport limitations are estimated by using the Weisz-Prater criterion (C<sub>WP</sub>) for the internal diffusion limitation (equation S1) and the Mears' criterion (C<sub>MM</sub>) for the external diffusion resistance (equation S2). According to references, the effect of the internal and external diffusions on the catalytic reaction is negligible if

$$C_{WP} = \frac{-r_{obs}\rho_c R_p^2}{D_e C_s} < 1 \quad S1$$

$$C_{MM} = \frac{-r_{obs}\rho_b R_p^n}{k_c C_{Ab}} < 0.1 \quad S2$$

Where  $r_{obs}$  is observed reaction rate (mol/kg<sub>cat</sub>/s);  $\rho_c$  is density of solid catalyst (kg/m<sup>3</sup>);  $R_p$  is catalyst particle radius (m);  $D_e$  is effective gas-phase diffusivity (m<sup>2</sup>/s);  $C_s$  is gas concentration of A at the external surface of the catalyst (mol/m<sup>3</sup>);  $\rho_b$  is bulk density of catalyst bed (kg/m<sup>3</sup>) = (1- $\Phi$ ) $\rho_c$  ( $\Phi$  = porosity);  $n$  is reaction order;  $k_c$  is external mass transfer coefficient (m/s);  $C_{Ab}$  is bulk gas concentration of A (mol/m<sup>3</sup>).

The  $D_e$  is calculated by the empirical formula (equation S3). The  $D_{C_3H_8-CO_2}$  (binary gas-phase diffusivity) containing in equation S3 is calculated by the Chapman-Enskog empirical formula (equation S4). The collision integral  $\Omega_{C_3H_8-CO_2}$  containing in equation S4 was calculated from the equation S5, which is the functional relationship of collision integral  $\Omega_{C_3H_8-CO_2}$  and  $k_B T / \epsilon_{CO-H_2}$ , where  $k_B$  is Boltzmann constant and  $T$  is reaction temperature. The physical parameters  $\sigma$  and  $\epsilon$  containing in equations S4 and S5 derived from the Lennard-Jones potential energy function, are determined by the equations S6 and S7, respectively, where  $\sigma_{C_3H_8} = 5.118 \text{ \AA}$ ,

$\sigma_{CO_2} = 3.941 \text{ \AA}$ ,  $\varepsilon/k_{B(C_3H_8)} = 237.1 \text{ K}^{-1}$ ,  $\varepsilon/k_{B(CO_2)} = 195.2 \text{ K}^{-1}$ . The  $D_{Ki}$  (Knudsen diffusivity) is calculated by the empirical formula (equation S8), where  $M_i$  and  $a$  are molar mass of reaction gas  $i$ , and the average pore radius of the catalyst determined from the  $N_2$  adsorption-desorption isotherms (Fig. S2b), respectively.

$$D_e = \frac{1}{\frac{1}{D_{C_3H_8-CO_2}} + \frac{1}{D}} \quad S3$$

$$D_{C_3H_8-CO_2} = 0.001858T^{\frac{3}{2}} \frac{\left(\frac{1}{M_{C_3H_8}} + \frac{1}{M_{CO_2}}\right)^{-1}}{P\sigma_{C_3H_8-CO_2}\Omega_C} \quad S4$$

$$\Omega_{C_3H_8-CO_2} = \frac{1}{\left(T/\varepsilon_{C_3H_8-CO_2}\right)^{0.145}} + \frac{1}{\left(T/\varepsilon_{C_3H_8-CO_2}\right)} \quad S5$$

$$\sigma_{C_3H_8-CO_2} = \frac{1}{2}(\sigma_{C_3H_8} + \sigma_{CO_2}) = 4. \quad S6$$

$$\varepsilon_{C_3H_8-CO_2} = (\varepsilon_{C_3H_8}\varepsilon_{CO_2})^{\frac{1}{2}} = 21. \quad S7$$

$$D_{Ki} = 9700a(T/M_i)^{\frac{1}{2}} \quad S8$$

The external mass transfer coefficient ( $k_c$ , m/s) of binary reaction gases from the bulk flow to the catalyst surface is calculated according to equation S9, which is derived from the mass-transfer correlation given in equation S10.

$$k_c = \frac{A D_{C_3H_8-CO_2} \left(\frac{\rho_g U d_p}{\mu \Phi}\right)^{1/2} \left(\frac{\mu}{\rho_g D_{C_3H_8-CO_2}}\right)}{d_p} \quad S9$$

$$Sh = A (Re^{1/2})(Sc^{1/3}), \quad Sh = \frac{k_c d_p}{D_{C_3H_8-CO_2}}, \quad Re = \frac{\rho_g U d_p}{\mu \Phi}, \quad Sc = \frac{\mu}{\rho_g D_i} \quad S10$$

where  $A$  is a dimensionless constant of 2.6 with the assumption of homogeneous spherical catalyst particles at 40-60 mesh,  $U$  is the superficial velocity (m/s),  $\mu$  is the dynamic viscosity (kg/m/s) of binary reaction gases,  $d_p$  is the average diameter of the catalyst particle (m), and  $\rho_g$  is the density of the binary reaction gases (kg/m<sup>3</sup>). The values for the parameters are determined and given in Table S1.



**Table S1** The interpretation, unit and calculated result of the parameters relating to Weisz-Prater and Mears' criterion equations.

| <b>Symbol</b>     | <b>Interpretation</b>                                          | <b>Unit</b>                                                    | <b>Value</b>         |
|-------------------|----------------------------------------------------------------|----------------------------------------------------------------|----------------------|
| $r_{\text{obs}}$  | Observed reaction rate                                         | $\text{mol}\cdot\text{kg}_{\text{cat}}^{-1}\cdot\text{s}^{-1}$ | $3.67\times 10^{-3}$ |
| $n$               | Reaction order                                                 | --                                                             | 1                    |
| $R_p$             | Particle radius of the catalyst                                | m                                                              | $1.70\times 10^{-4}$ |
| $\rho_c$          | Bulk density of the catalyst                                   | $\text{kg}/\text{m}^3$                                         | 647.96               |
| $\rho_b$          | Bulk density of the catalyst bed                               | $\text{kg}/\text{m}^3$                                         | 473.92               |
| $\Phi$            | Porosity                                                       | %                                                              | 0.54                 |
| $a$               | Average pore radius of the catalyst                            | m                                                              | $3.70\times 10^{-9}$ |
| $D_e$             | Effective diffusivity                                          | $\text{m}^2\cdot\text{s}^{-1}$                                 | $8.13\times 10^{-6}$ |
| $C_s$             | Gas concentration of A at the external surface of the catalyst | $\text{mol}\cdot\text{m}^{-3}$                                 | 54.82                |
| $C_{Ab}$          | Bulk gas concentration of A                                    | $\text{mol}\cdot\text{m}^{-3}$                                 | 54.82                |
| $k_c$             | External mass transfer coefficient                             | $\text{m}\cdot\text{s}^{-1}$                                   | $1.91\times 10^{-3}$ |
| $A$               | A dimensionless constant                                       | --                                                             | 2.60                 |
| $U$               | Superficial velocity                                           | $\text{m}\cdot\text{s}^{-1}$                                   | 0.25                 |
| $\mu$             | Dynamic viscosity                                              | $\text{kg}\cdot\text{m}^{-1}\cdot\text{s}^{-1}$                | $3.13\times 10^{-5}$ |
| $d_p$             | Average diameter of the catalyst particle                      | m                                                              | $3.40\times 10^{-4}$ |
| $\rho_g$          | Density of the reaction gas                                    | $\text{kg}\cdot\text{m}^{-3}$                                  | 0.83                 |
| $D_{C_3H_8-CO_2}$ | Binary gas-phase diffusivity                                   | $\text{m}^2\cdot\text{s}^{-1}$                                 | $8.11\times 10^{-6}$ |
| $D_{ki}$          | Knudsen diffusivity                                            | $\text{m}^2\cdot\text{s}^{-1}$                                 | $1.60\times 10^{-4}$ |

The substitution of the values for the parameters into the  $C_{WP}$  and  $C_{MM}$  equations leads to

$$C_{WP} = \frac{-r_{obs} \rho_c R_p^2}{D_e C_s}$$

$$= \frac{[(3.67 \times 10^{-3} \text{ mol} \cdot \text{kg}_{cat}^{-1} \text{ s}^{-1}) \times (647.96 \text{ kg} \cdot \text{m}^{-3}) \times (1.70 \times 10^{-4} \text{ m})^2]}{[(8.13 \times 10^{-6} \text{ m}^2 \cdot \text{s}^{-1}) \times (54.82 \text{ mol} \cdot \text{m}^{-3})]}$$

$$= 1.54 \times 10^{-3} < 1$$

$$C_{MM} = \frac{-r_{obs} \rho_b R_p n}{k_c C_{Ab}}$$

$$= \left[ \frac{(3.67 \times 10^{-3} \text{ mol} \cdot \text{kg}_{cat}^{-1} \cdot \text{s}^{-1}) \times (473.92 \text{ kg} \cdot \text{m}^{-3}) \times (1.70 \times 10^{-4} \text{ m}) \times 1}{(1.91 \times 10^{-3} \text{ m} \cdot \text{s}^{-1}) \times (54.82 \text{ mol} \cdot \text{m}^{-3})} \right]$$

$$= 2.82 \times 10^{-3} < 0.15$$

Thus, the internal and external diffusion limitations are negligible over the  $\text{VO}_x\text{-SiO}_2$  catalysts for  $\text{CO}_2\text{-ODP}$ .
