# Supplementary figures and images for: Bridging the structural gap of supported vanadium oxides for oxidative dehydrogenation of propane with carbon dioxide
Source: Royal Society of Chemistry journal article supplement (doi:10.1039/d4ey00094c), 2024-01-01

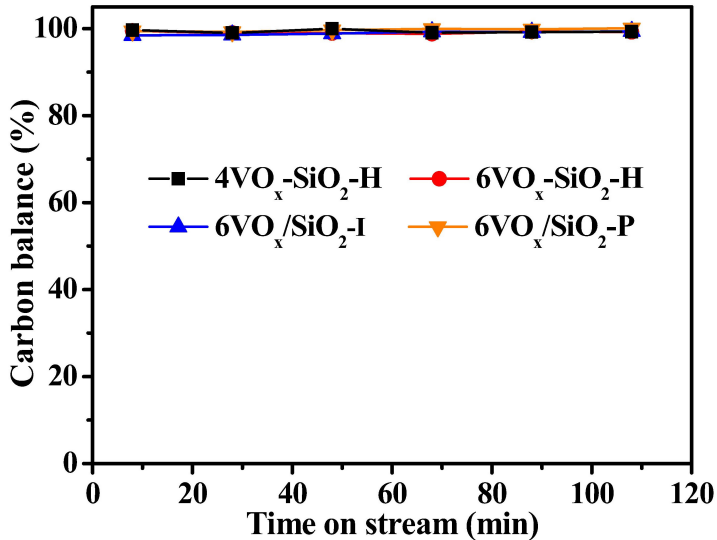

Supplement: d4ey00094c1.pdf [file d4ey00094c1.pdf]

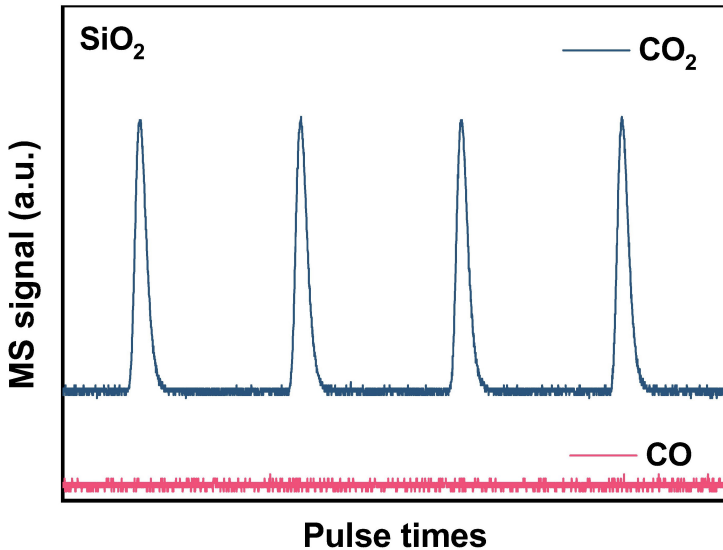

Supplement: d4ey00094c10.pdf [file d4ey00094c10.pdf]

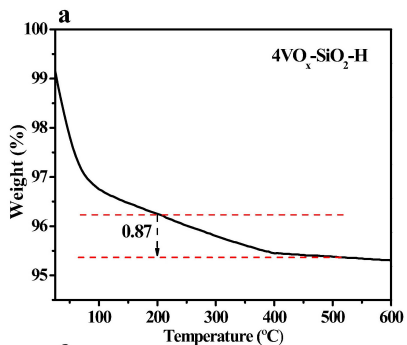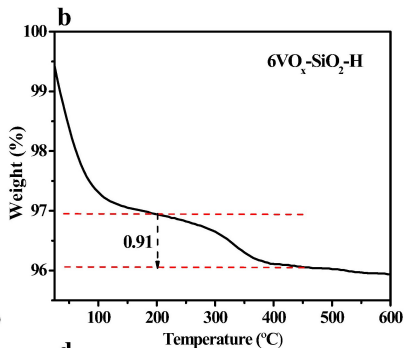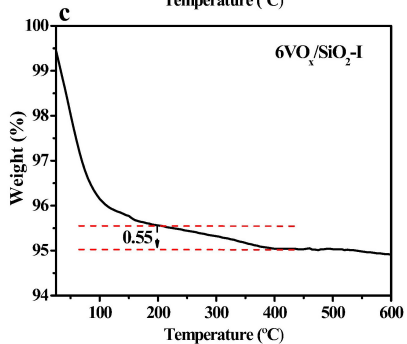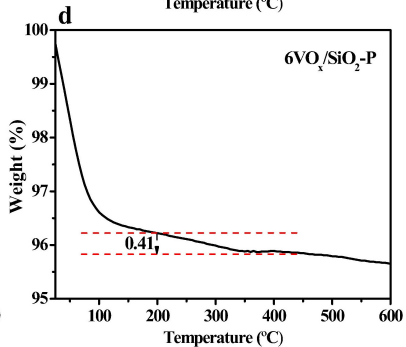

Supplement: d4ey00094c11.pdf [file d4ey00094c11.pdf]

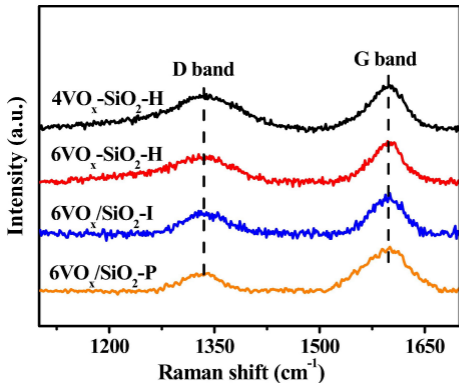

Supplement: d4ey00094c2.pdf [file d4ey00094c2.pdf]

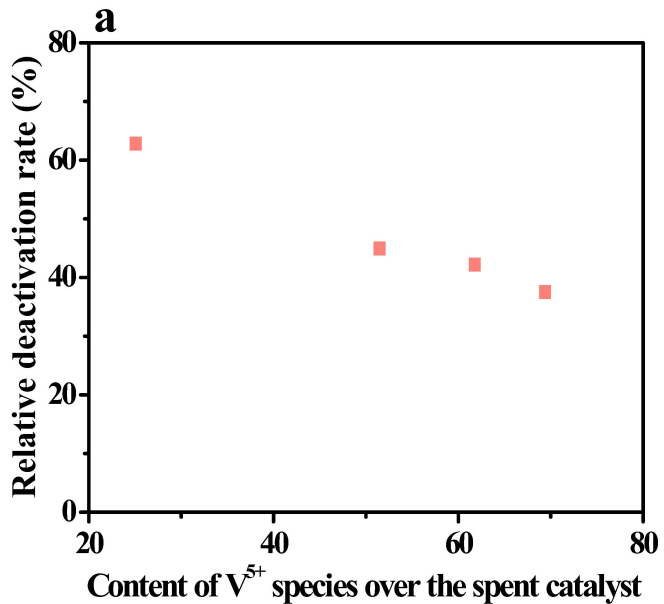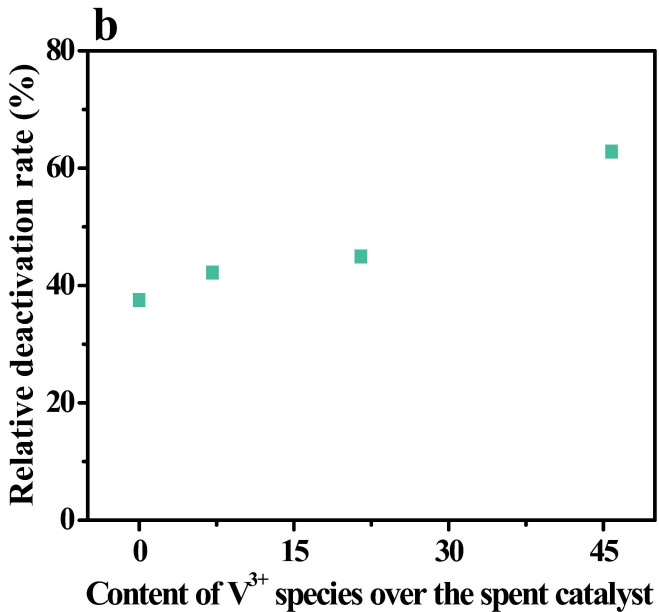

Supplement: d4ey00094c3.pdf [file d4ey00094c3.pdf]

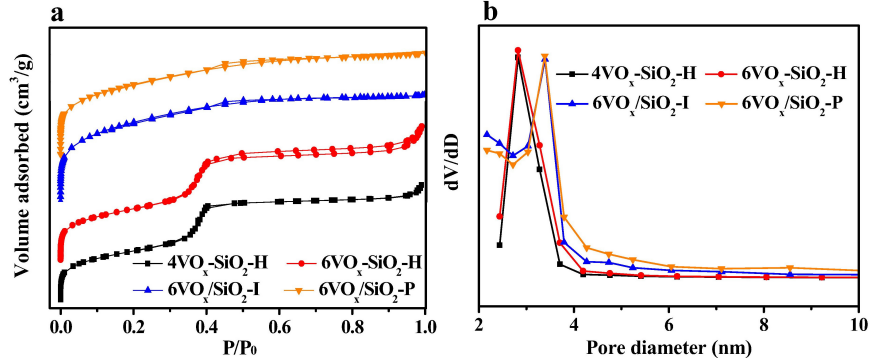

Supplement: d4ey00094c4.pdf [file d4ey00094c4.pdf]

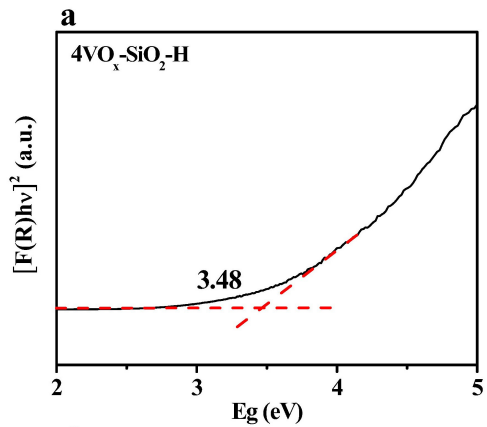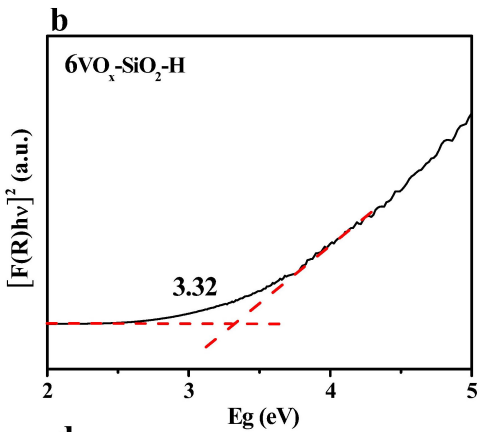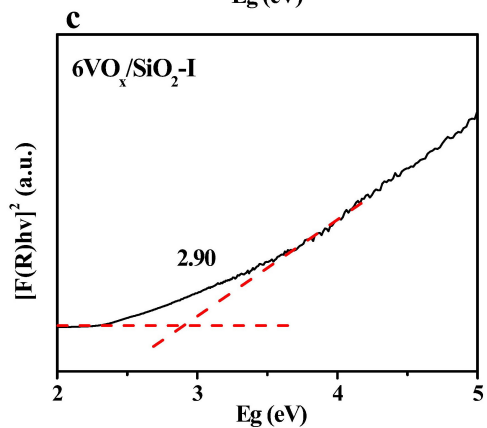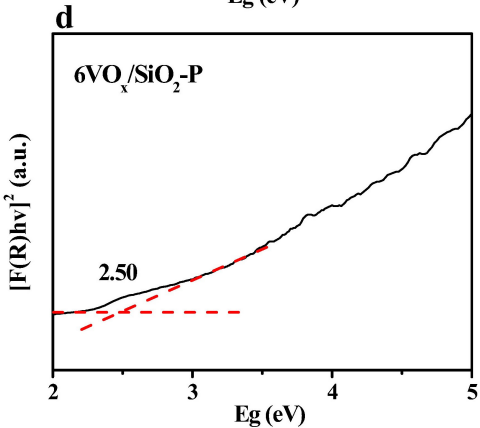

Supplement: d4ey00094c5.pdf [file d4ey00094c5.pdf]

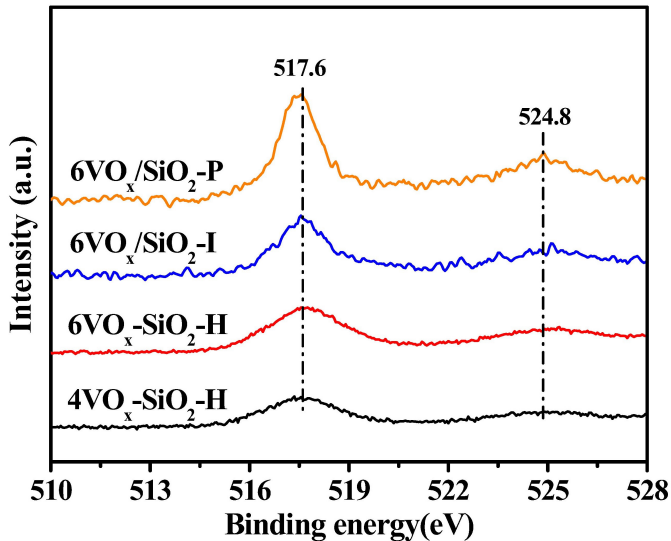

Supplement: d4ey00094c6.pdf [file d4ey00094c6.pdf]

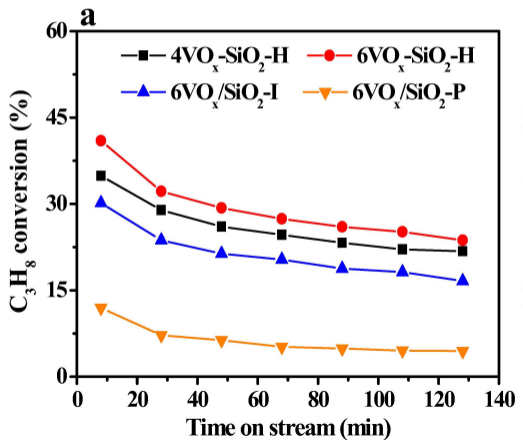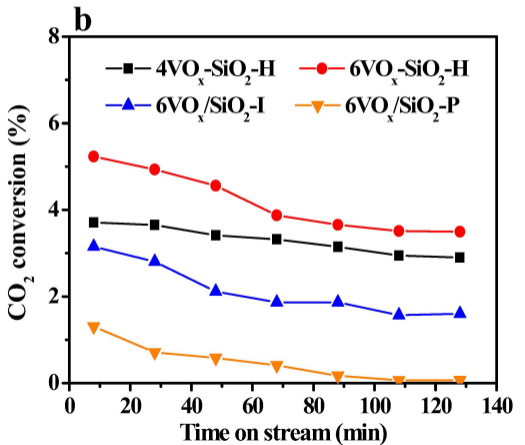

Supplement: d4ey00094c7.pdf [file d4ey00094c7.pdf]

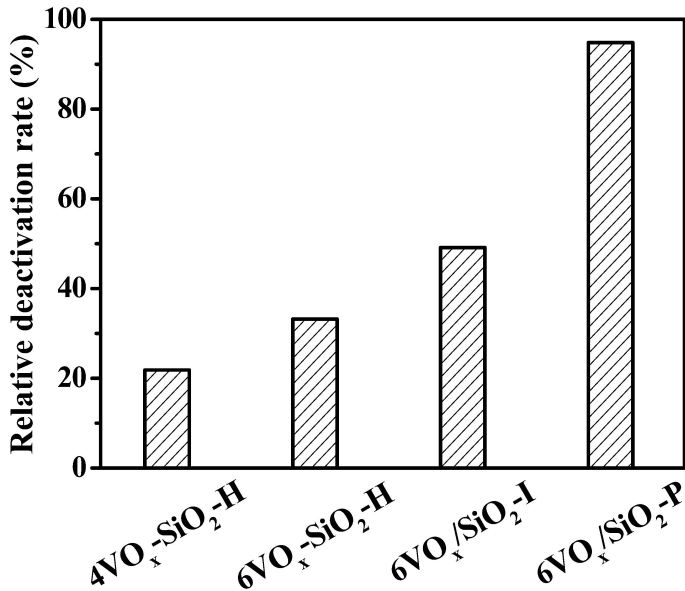

Supplement: d4ey00094c8.pdf [file d4ey00094c8.pdf]

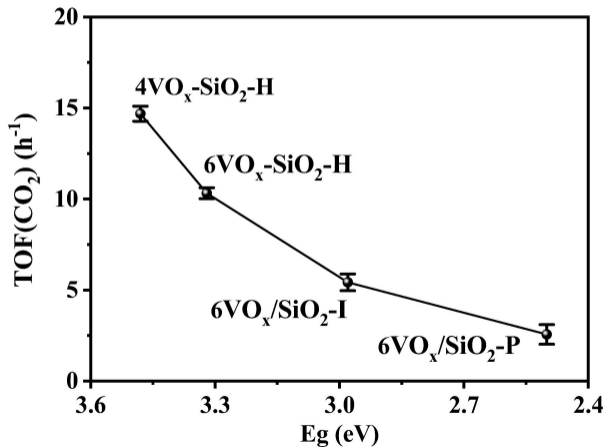

Supplement: d4ey00094c9.pdf [file d4ey00094c9.pdf]
